# Supplementary material for: Ag-Modified Porous Perovskite-Type LaFeO3 for Efficient Ethanol Detection
Source: MDPI journal article supplement (doi:10.3390/nano12101768), 2022-05-22
Supplement: s1 [file s1]

# Ag-Modified Porous Perovskite-Type $\text{LaFeO}_3$ for Efficient Ethanol Detection

Jiejie Yu <sup>1,†</sup>, Cong Wang <sup>1,†</sup>, Quan Yuan <sup>1</sup>, Xin Yu <sup>1</sup>, Ding Wang <sup>1,\*</sup>, Yang Chen <sup>2,3,\*</sup>

<sup>1</sup> School of Materials and Chemistry, University of Shanghai for Science & Technology, Shanghai 200093, China; m15370026136@163.com (J.Y.); wangcong\_0311@163.com (C.W.); yquan0327@163.com (Q.Y.); yuxin156625861@163.com (X.Y.)

<sup>2</sup> NEST Lab, Department of Physics, Department of Chemistry, College of Sciences, Shanghai University, Shanghai 200444, China

<sup>3</sup> Shanghai Yaolu Instrument & Equipment Co., Ltd., Shanghai 200444, China

\* Correspondence: wangding@usst.edu.cn (D.W.); shucy@shu.edu.cn (Y.C.)

† These authors contributed equally to this work.

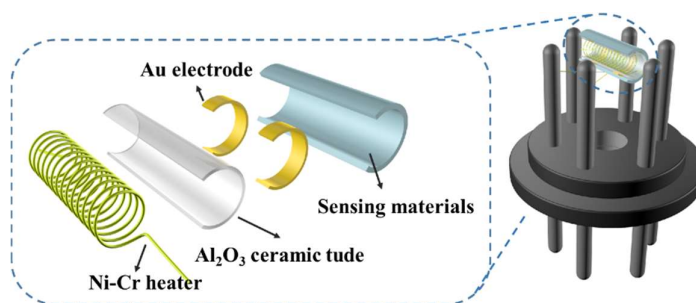

**Figure S1.** The schematic structure of the gas sensor.

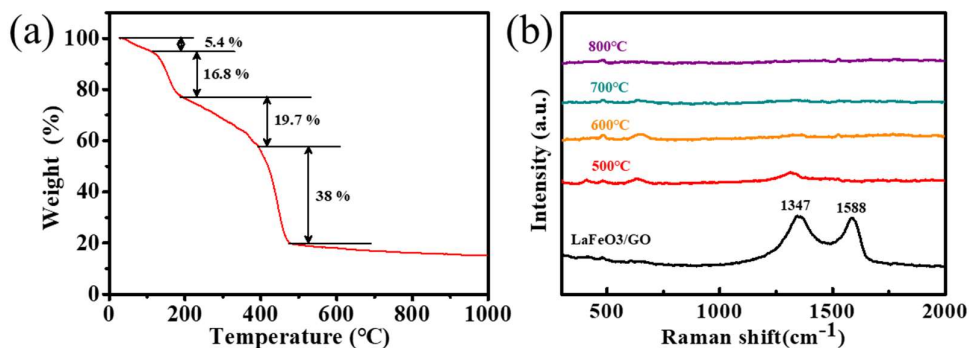

**Figure S2.** (a) TG curves of  $\text{LaFeO}_3/\text{GO}$ , (b) Raman spectra of the  $\text{LaFeO}_3$  samples with different calcination temperatures.

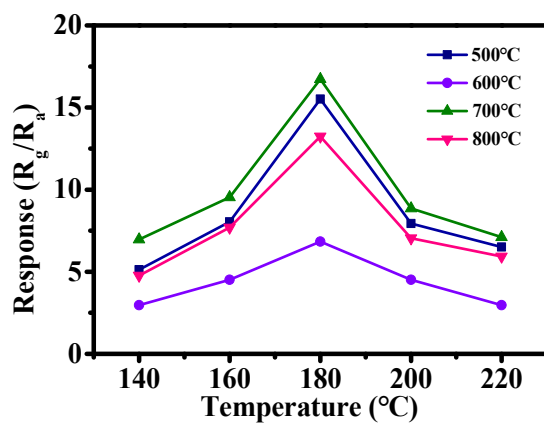

**Figure S3.** Response of LaFeO<sub>3</sub> samples toward 50 ppm of EtOH at operation temperature ranging from 140 to 220 °C.

**Table S1.** Fitting results of O 1s XPS spectra of Ag-LaFeO<sub>3</sub>-0 and Ag-LaFeO<sub>3</sub>-5.

| Samples                  |                         | O <sub>lat</sub> | O <sub>def</sub> | O <sub>abs</sub> |
|--------------------------|-------------------------|------------------|------------------|------------------|
| Ag-LaFeO <sub>3</sub> -0 | Binding energy (eV)     | 528.7            | 531.2            | 532.5            |
|                          | Relative percentage (%) | 46.71            | 46.55            | 6.74             |
| Ag-LaFeO <sub>3</sub> -5 | Binding energy (eV)     | 528.6            | 531.2            | 532.4            |
|                          | Relative percentage (%) | 46.25            | 44.28            | 9.47             |
